# Supplementary material for: CdSe/ZnS Quantum Dots Impaired the First Two Generations of Placenta Growth in an Animal Model, Based on the Shh Signaling Pathway
Source: PubMed Central journal article supplement (PMC6409599; doi:10.3390/nano9020257), 2019-02-14
Supplement: nanomaterials-09-00257-s001.pdf [file nanomaterials-09-00257-s001.pdf]

Supplementary materials

# **CdSe/ZnS Quantum Dots Impaired the First Two Generations of Placenta Growth in an Animal Model, Based on the Shh Signaling Pathway**

**Wuding Hong<sup>1</sup>, Huijuan Kuang<sup>1</sup>, Xingping He<sup>1</sup>, Lin Yang<sup>1</sup>, Pengfei Yang<sup>1</sup>, Bolu Chen<sup>1</sup>, Zoraida P. Aguilar<sup>2</sup> and Hengyi Xu<sup>1,\*</sup>**

<sup>1</sup> State Key Laboratory of Food Science and Technology, Nanchang University, Nanchang 330047, China; 407205116020@email.ncu.edu.cn (W.H.); huijuankuang@126.com (H.K.); hxpoutlook@126.com (X.H.); ylwyh7729836@126.com (L.Y.); hnayypf@126.com (P.Y.); 407205117055@email.ncu.edu.cn (B.C.)

<sup>2</sup> Zystein, LLC., Fayetteville, AR 72704, USA; zaguilar@zystein.com

\* Correspondence: kidyxu@163.com or HengyiXu@ncu.edu.cn; Tel.: +0086-791-8830-4447-ext-9520

**A**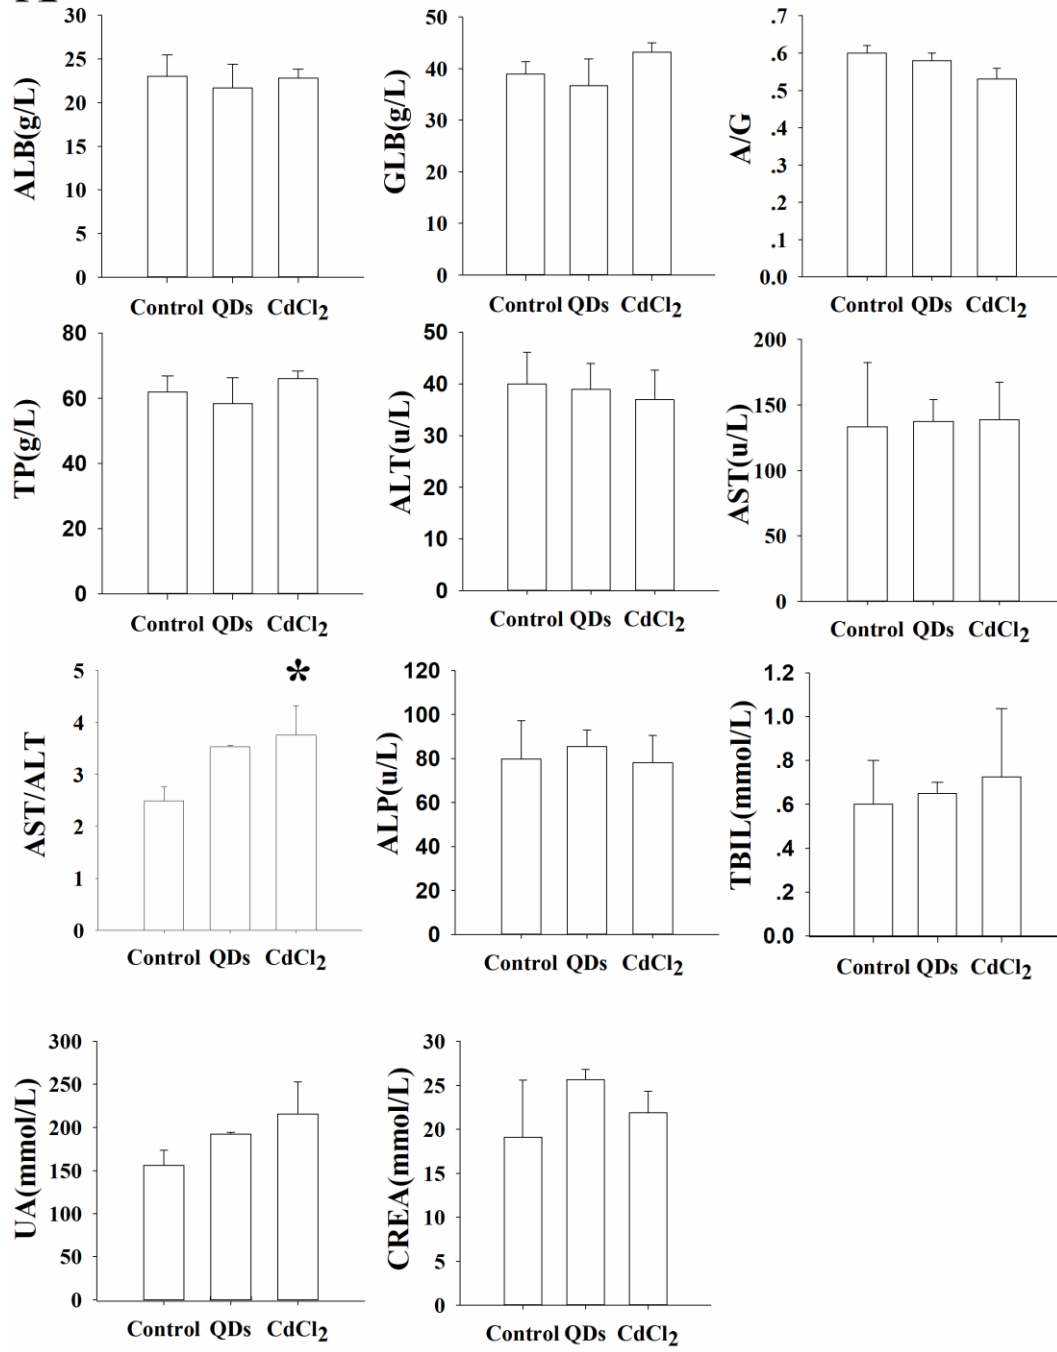

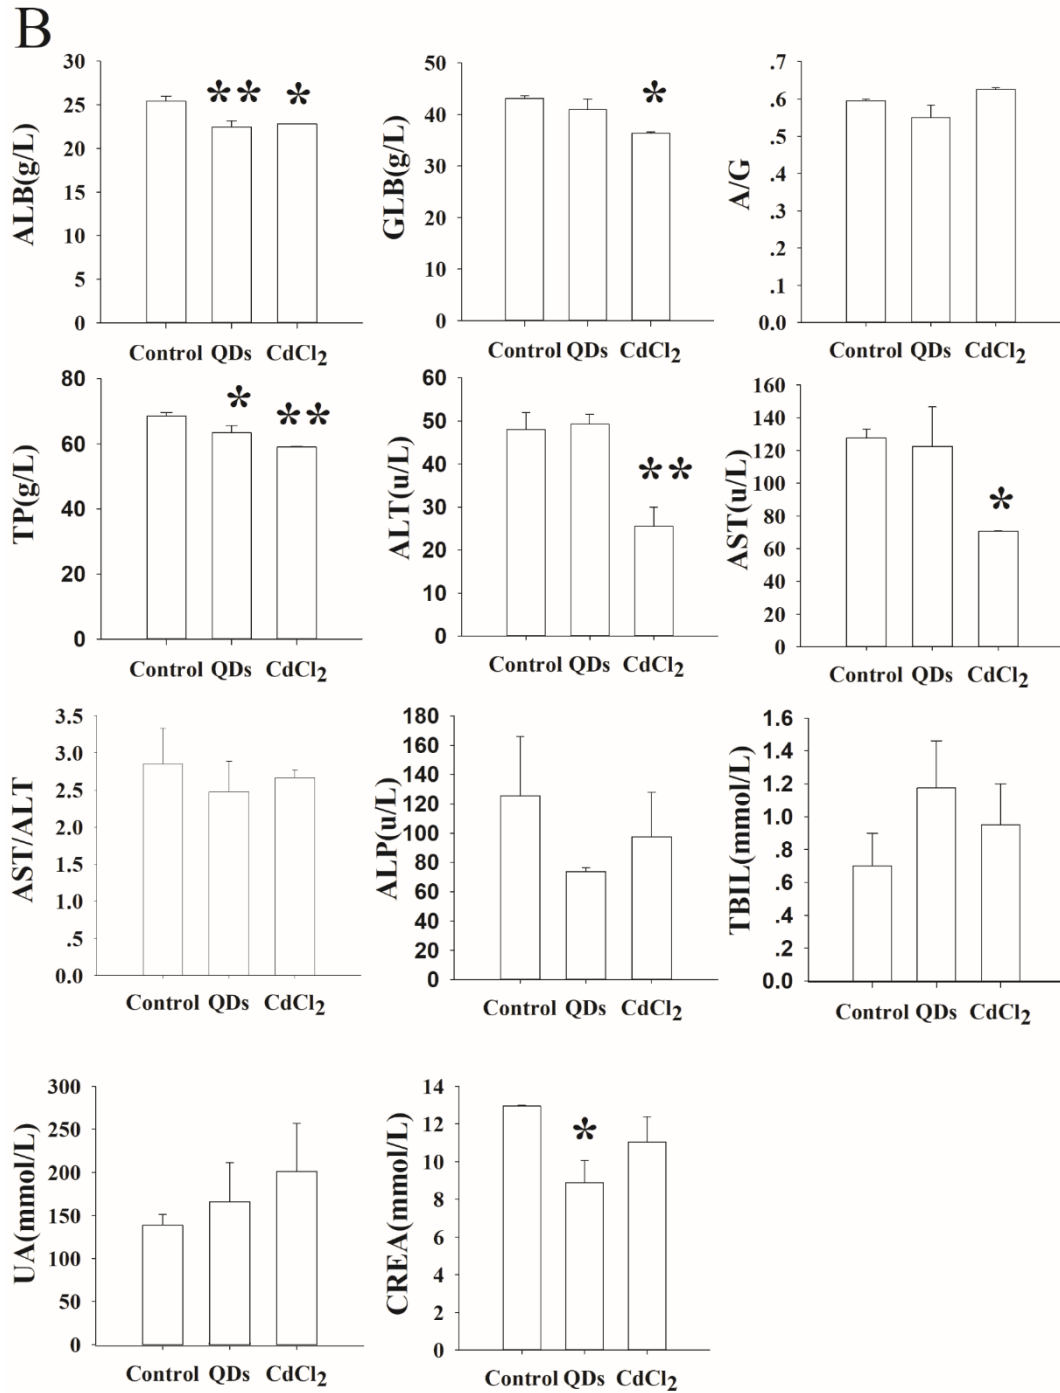

**Figure S1.** Serum biochemical analysis of mice sacrificed at P0 GD 18 (A); and PND 21 (B). \*P < 0.05, \*\*P < 0.01, #P < 0.001 vs. control.

Tables

Table S1. RT-qPCR primer pairs.

| Gene             | Description       | Primer Sequence               | Size (bp) |
|------------------|-------------------|-------------------------------|-----------|
| <i>Smo</i>       | <i>Smo</i> -F     | 5'-CTTGATGGCTGGAGTAGTCTGG-3'  | 121       |
|                  | <i>Smo</i> -R     | 5'-CGTGAGCAGGTGGAAATAGGA-3'   |           |
| <i>SUFU</i>      | <i>SUFU</i> -F    | 5'-TTTCCTCCAGATTGTTGGTGTC-3'  | 97        |
|                  | <i>SUFU</i> -R    | 5'-AATGGGCACTGTCCGTAGTAG-3'   |           |
| <i>KIF7</i>      | <i>KIF7</i> -F    | 5'-CACCGTCTTTGCCTATGGTC-3'    | 151       |
|                  | <i>KIF7</i> -R    | 5'-GTCCAGCAGGTCATTCTCATCA-3'  |           |
| <i>Ptch1</i>     | <i>Ptch1</i> -F   | 5'-CCCGTCAGAAGATAGGAGAAG-3'   | 281       |
|                  | <i>Ptch1</i> -R   | 5'-CCAGAAGCAGTCCAAAGGTG-3'    |           |
| <i>Gli1</i>      | <i>Gli1</i> -F    | 5'-TACATGCTGGTGGTGCACAT-3'    | 162       |
|                  | <i>Gli1</i> -R    | 5'-GCTGCAACCTTCTTGCTCAC-3'    |           |
| <i>Gli2</i>      | <i>Gli2</i> -F    | 5'-GAAAGAAGCCAAGAGTGGTCTC-3'  | 236       |
|                  | <i>Gli2</i> -R    | 5'-TGACAGGGCTGCCACTTAGG-3'    |           |
| <i>Gli3</i>      | <i>Gli3</i> -F    | 5'-AGCAAGTGGTTCCTATGGGC-3'    | 173       |
|                  | <i>Gli3</i> -R    | 5'-ATGTTGGAGCAGGGTGGATG-3'    |           |
| <i>Caspase-3</i> | <i>Caspase-3F</i> | 5'-GGAGGCTGACTTCCTGTATGCTT-3' | 157       |
|                  | <i>Caspase-3R</i> | 5'-CCTGTTAACGCGAGTGAGAATG-3'  |           |
| <i>Bcl-2</i>     | <i>Bcl-2F</i>     | 5'-CACTCGACCTTGTTTCTTCCAG-3'  | 146       |
|                  | <i>Bcl-2R</i>     | 5'-TCCTAACCCCTTGCTCTGCTT-3'   |           |
| <i>Gclc</i>      | <i>Gclc</i> -F    | 5'-TGGCAGACAATGAGGTTT-3'      | 173       |
|                  | <i>Gclc</i> -R    | 5'-AGCGGAATGAGGAAGTCT-3'      |           |
| <i>HO-1</i>      | <i>HO-1-F</i>     | 5'-ACCGCCTTCTGCTCAAC-3'       | 195       |
|                  | <i>HO-1-R</i>     | 5'-GAGGAGCGGTGTCTGGGAT-3'     |           |
| <i>GAPDH</i>     | <i>GAPDH-F</i>    | 5'-ATGTGTCCGTCGTGGATCTG-3'    | 242       |
|                  | <i>GAPDH-R</i>    | 5'-GCCGTATTCATTGTCATACCAGG-3' |           |

**Table S2.** Whole blood analysis from P0 female mice treated with normal saline, CdSe/ZnS QDs, and CdCl<sub>2</sub> in GD 18 stage.

| <b>Whole Blood Parameter</b> | <b>Control</b> | <b>CdSe/ZnS QDs</b> | <b>CdCl<sub>2</sub></b> |
|------------------------------|----------------|---------------------|-------------------------|
| WBC × 10 <sup>9</sup> /L     | 9.43 ± 0.05    | 11.5 ± 1.3          | 12.5 *                  |
| RBC × 10 <sup>12</sup> /L    | 9.49 ± 1.34    | 9.19 ± 0.35         | 10.15                   |
| HGB                          | 143.33 ± 19.26 | 131 ± 1.63          | 131.5 ± 12.5            |
| HCT                          | 0.51 ± 0.06    | 0.47 ± 0.02         | 0.47 ± 0.05             |
| MCV                          | 53.6 ± 1.19    | 51.57 ± 0.12 *      | 52.4 ± 0.4              |
| MCH                          | 15.1 ± 0.33    | 14.23 ± 0.41        | 14.6 ± 0.4              |
| MCHC g/L                     | 282 ± 6.16     | 279 ± 8.6           | 278.5 ± 5.5             |
| PLT × 10 <sup>9</sup> /L     | 1357.5 ± 275.5 | 700 ± 61 *          | 1509.5 ± 70.5           |

Values are expressed as mean ± SD, n = 4 in each group.

\*P < 0.05, \*\*P < 0.01 vs. control.

**Table S3.** Whole blood analysis from female mice treated with normal saline, CdSe/ZnS QDs, and CdCl<sub>2</sub> in PND 21.

| <b>Whole Blood Parameter</b> | <b>Control</b> | <b>CdSe/ZnS QDs</b> | <b>CdCl<sub>2</sub></b> |
|------------------------------|----------------|---------------------|-------------------------|
| WBC × 10 <sup>9</sup> /L     | 7.7 ± 0.9      | 11.3 ± 1.76         | 8.65 ± 1.45             |
| RBC × 10 <sup>12</sup> /L    | 12.41 ± 0.65   | 10.31 ± 0.87 *      | 10.04 ± 0.37 *          |
| HGB                          | 173 ± 4        | 148.25 ± 7.73       | 101 ± 46                |
| HCT                          | 0.65 ± 0.03    | 0.53 ± 0.04 *       | 0.57 ± 0.03             |
| MCV                          | 52.55 ± 0.05   | 51.05 ± 1.82        | 56.8 ± 0.4 *            |
| MCH                          | 14 ± 0.4       | 14.23 ± 0.82        | 15.05 ± 0.15            |
| MCHC g/L                     | 265.5 ± 7.5    | 283 ± 17.76         | 265.5 ± 4.5             |
| PLT × 10 <sup>9</sup> /L     | 1585 ± 327     | 1395.75 ± 198.93    | 1298 ± 62               |

Values are expressed as mean ± SD, n = 4 in each group.

\*P < 0.05, \*\*P < 0.01 vs. control.

**Table S4.** Whole blood analysis from F1 female mice treated with normal saline, CdSe/ZnS QDs, and CdCl<sub>2</sub>.

| <b>Whole Blood Parameter</b> | <b>Control</b>  | <b>CdSe/ZnS QDs</b> | <b>CdCl<sub>2</sub></b> |
|------------------------------|-----------------|---------------------|-------------------------|
| WBC × 10 <sup>9</sup> /L     | 8.03 ± 0.97     | 7.48 ± 0.89         | 5.2 ± 1.56 **           |
| RBC × 10 <sup>12</sup> /L    | 8.42 ± 0.59     | 9.31 ± 0.59         | 8.53 ± 0.51             |
| HGB                          | 165 ± 13.55     | 168.25 ± 6.68       | 149.338 ± 11.00         |
| HCT                          | 0.56 ± 0.07     | 0.62 ± 0.04         | 0.51 ± 0.05             |
| MCV                          | 65.98 ± 3.93    | 66.2 ± 3.57         | 59.68 ± 3.25 *          |
| MCH                          | 19.58 ± 0.33    | 17.93 ± 0.48 *      | 17.52 ± 0.99 **         |
| MCHC g/L                     | 297.75 ± 13.25  | 273.75 ± 14.04      | 294.33 ± 18.50          |
| PLT × 10 <sup>9</sup> /L     | 905.67 ± 135.22 | 667.5 ± 109.37      | 826.67 ± 301.74         |

Values are expressed as mean ± SD, n = 4 in each group.

\*P < 0.05, \*\*P < 0.01 vs. control.
